# Supplementary material for: Characterization of Nutritional Composition, Antioxidative Capacity, and Sensory Attributes of Seomae Mugwort, a Native Korean Variety of Artemisia argyi H. Lév. & Vaniot
Source: PubMed Central journal article supplement (PMC4621344; doi:10.1155/2015/916346), 2015-10-13
Supplement: 916346.f1.pdf [file 916346.f1.pdf]

**Supplemental Figure 1.**

Representative total ion chromatograms of volatile compounds present in *Artemisia princeps*

Pamp. (A), *Seomae* mugwort (B), and aromagram of *Seomae* mugwort (C)

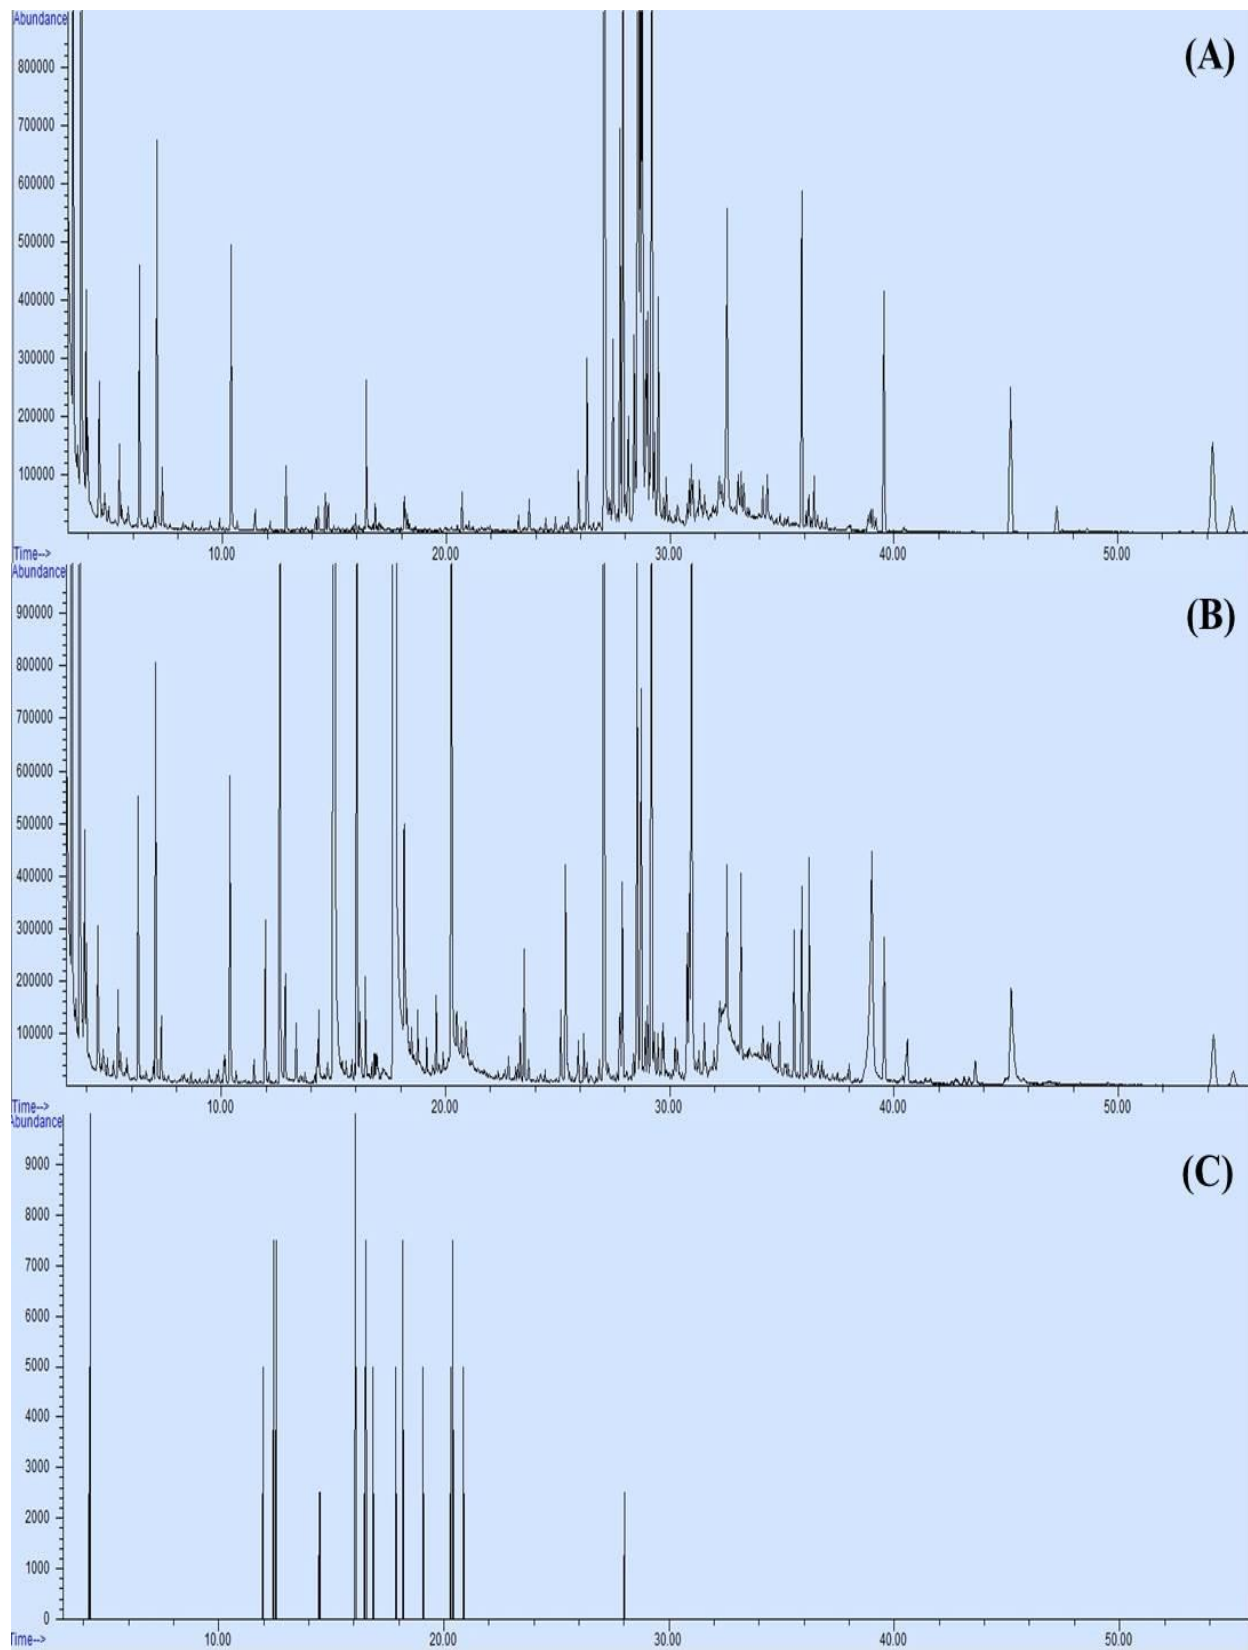

Supplemental Figure 1. Kim JK *et al.*
